# Supplementary material for: N-Terminal Acetylation by NatC Is Not a General Determinant for Substrate Subcellular Localization in Saccharomyces cerevisiae
Source: PubMed Central journal article supplement (PMC3626706; doi:10.1371/journal.pone.0061012), 2013-04-15
Supplement: pone.0061012.s003.pdf [file pone.0061012.s003.pdf]



S3A. Sec18-GFP in *yNAA30* WT



S3B. Sec18-GFP in *ynaa30Δ*

This fluorescence microscopy image shows several yeast cells expressing Sec18-GFP in a *ynaa30Δ* background. The cells exhibit a punctate localization of the Sec18-GFP protein, with bright green spots concentrated in the bud neck region. The cells are scattered across the field of view, with some appearing as single buds and others as small clusters or chains. The background is dark, highlighting the green fluorescence of the protein.
