# Supplementary material for: N-Terminal Acetylation by NatC Is Not a General Determinant for Substrate Subcellular Localization in Saccharomyces cerevisiae
Source: PubMed Central journal article supplement (PMC3626706; doi:10.1371/journal.pone.0061012), 2013-04-15
Supplement: pone.0061012.s004.pdf [file pone.0061012.s004.pdf]



S4A. Sly41-GFP in *yNAA30* WT



S4B. Sly41-GFP in *yna30* $\Delta$
