# Supplementary material for: N-Terminal Acetylation by NatC Is Not a General Determinant for Substrate Subcellular Localization in Saccharomyces cerevisiae
Source: PubMed Central journal article supplement (PMC3626706; doi:10.1371/journal.pone.0061012), 2013-04-15
Supplement: pone.0061012.s008.pdf [file pone.0061012.s008.pdf]

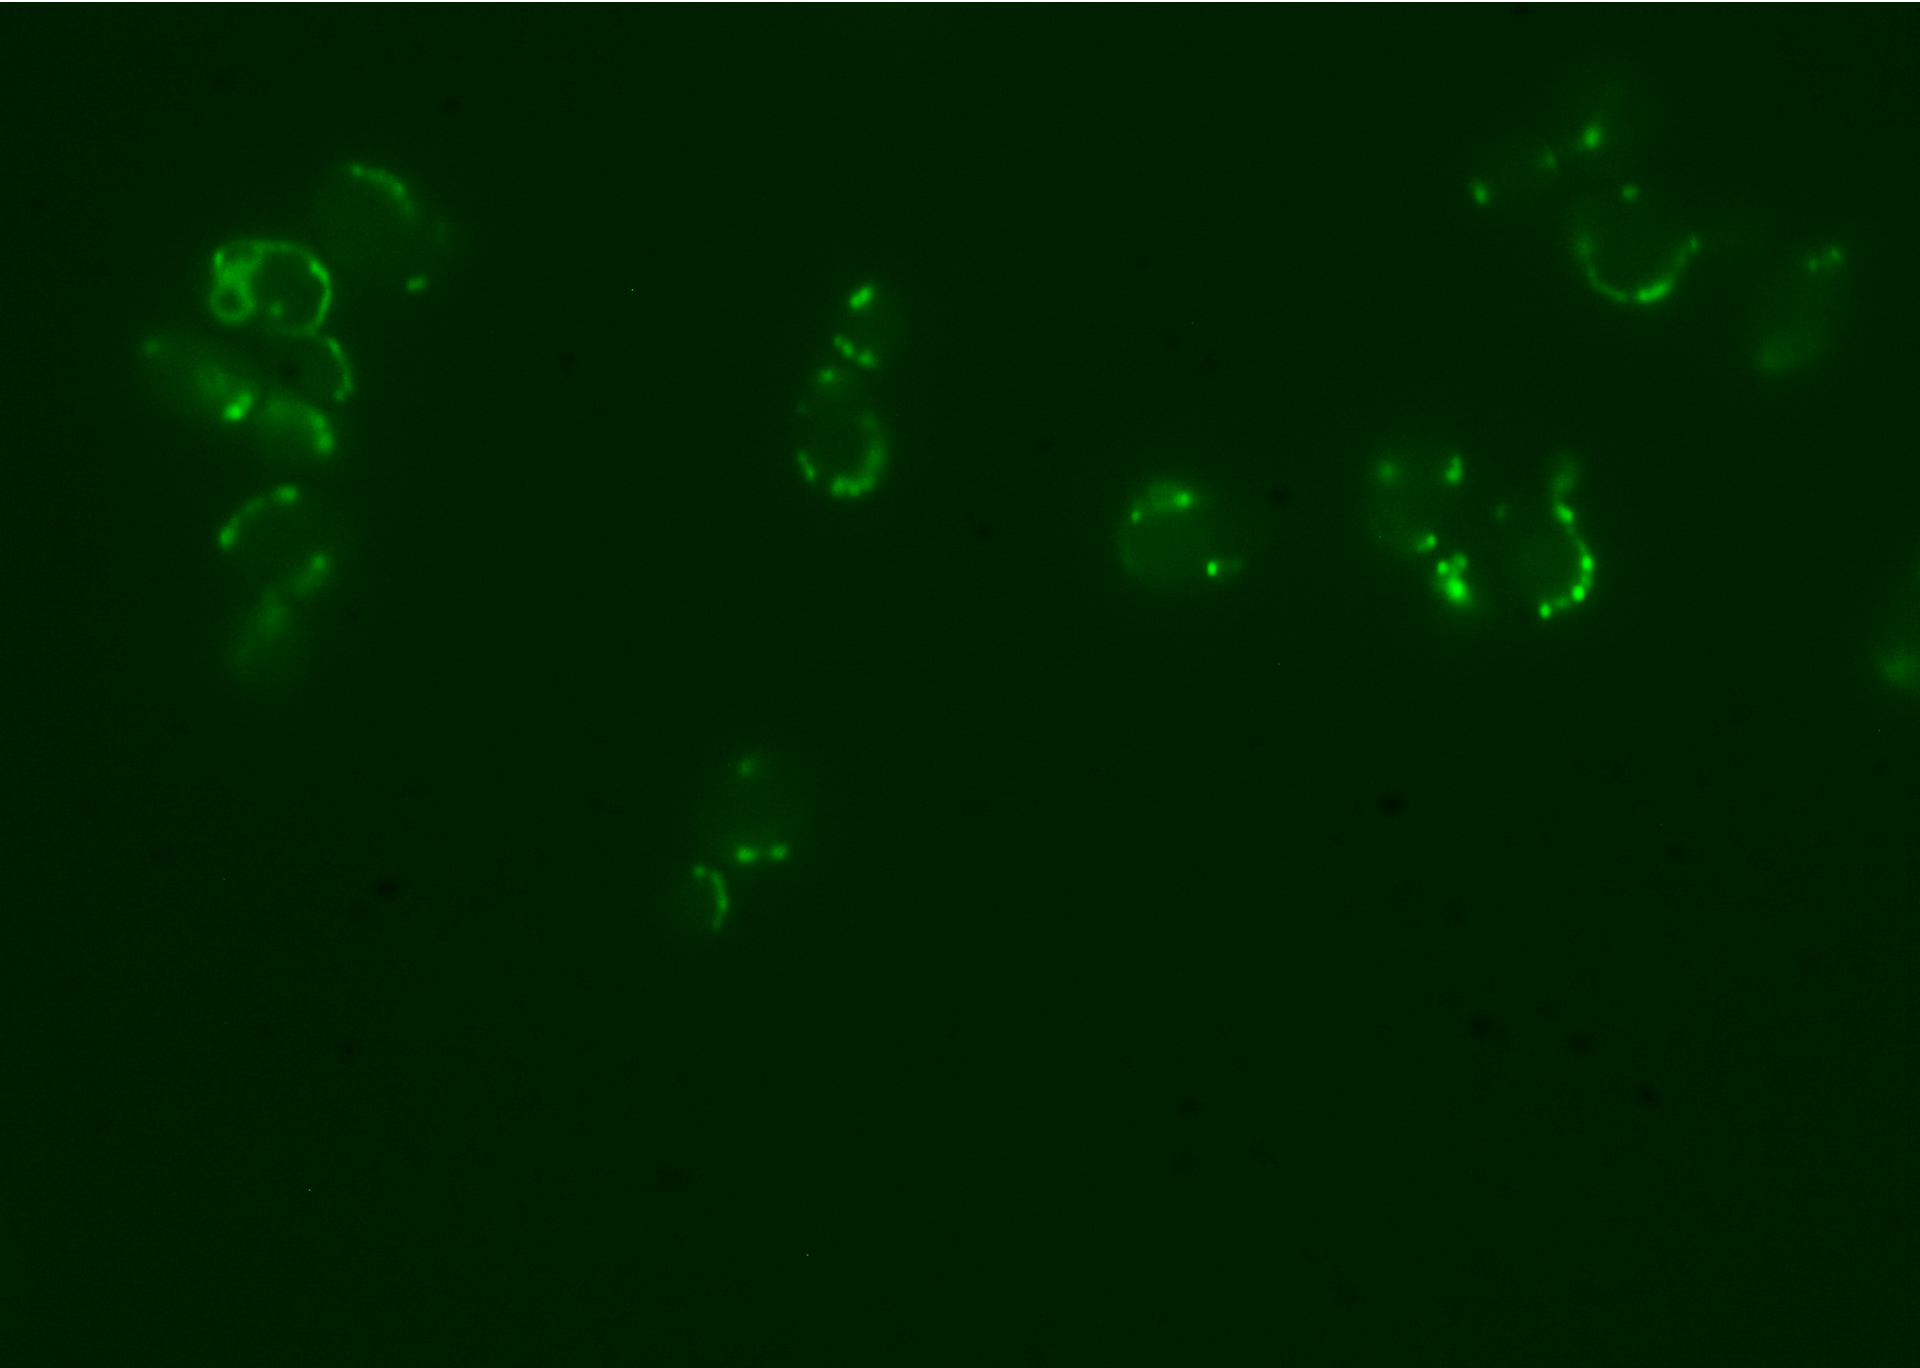

S8A. Ymr31-GFP in yNAA30 WT

A fluorescence microscopy image showing several yeast cells expressing Ymr31-GFP in a *yna30Δ* background. The cells exhibit various patterns of green fluorescence, including punctate localization and filamentous structures. The background is dark, highlighting the green signal.

S8B. Ymr31-GFP in *yna30Δ*
