# Supplementary material for: N-Terminal Acetylation by NatC Is Not a General Determinant for Substrate Subcellular Localization in Saccharomyces cerevisiae
Source: PubMed Central journal article supplement (PMC3626706; doi:10.1371/journal.pone.0061012), 2013-04-15
Supplement: pone.0061012.s011.pdf [file pone.0061012.s011.pdf]

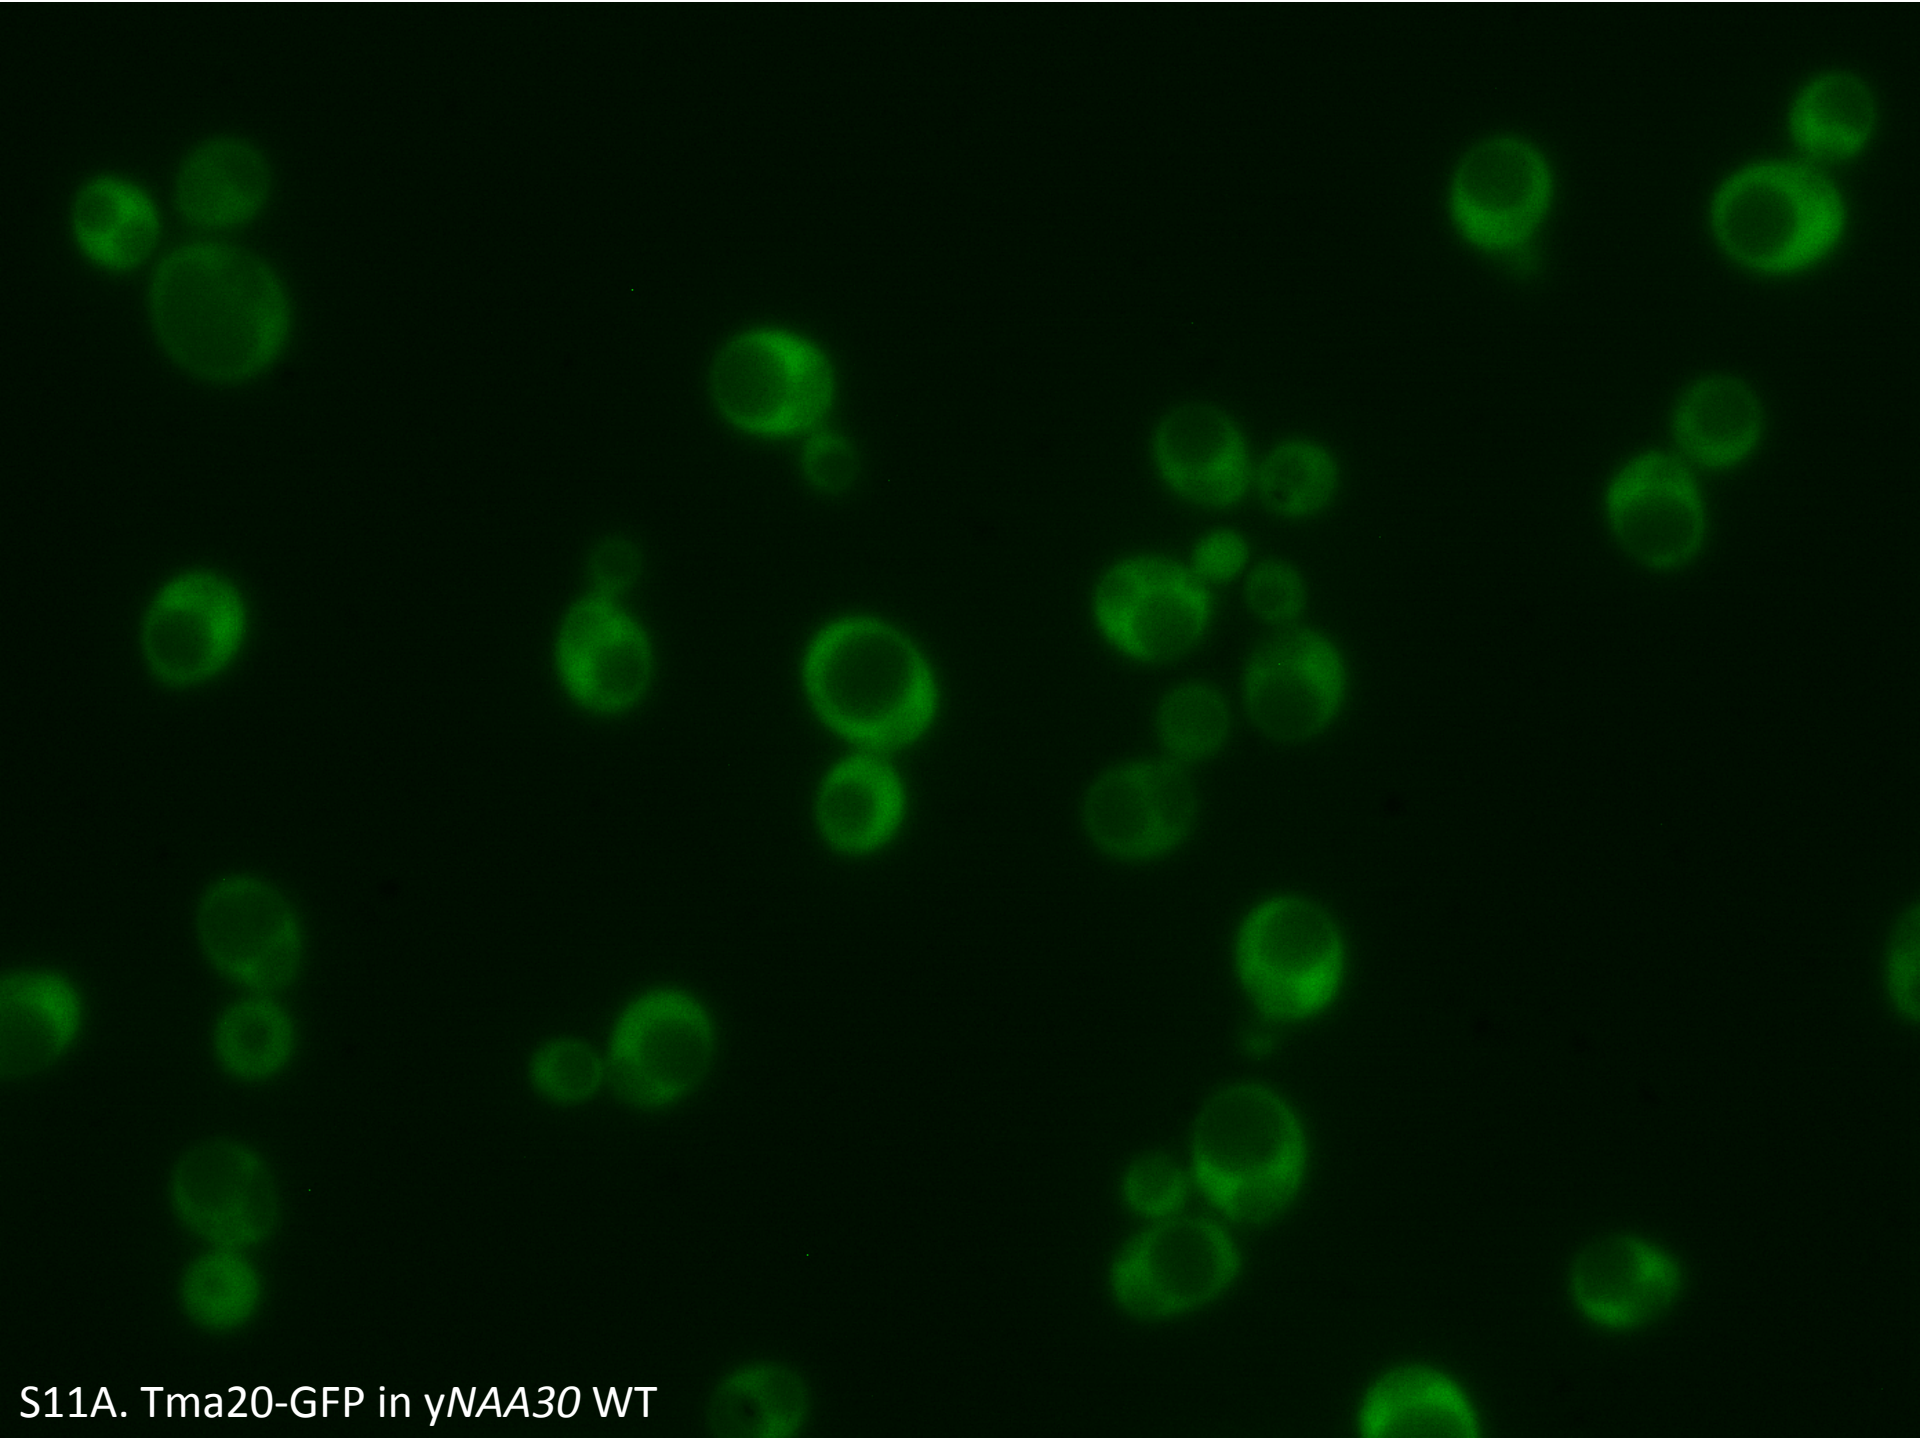

S11A. Tma20-GFP in yNAA30 WT

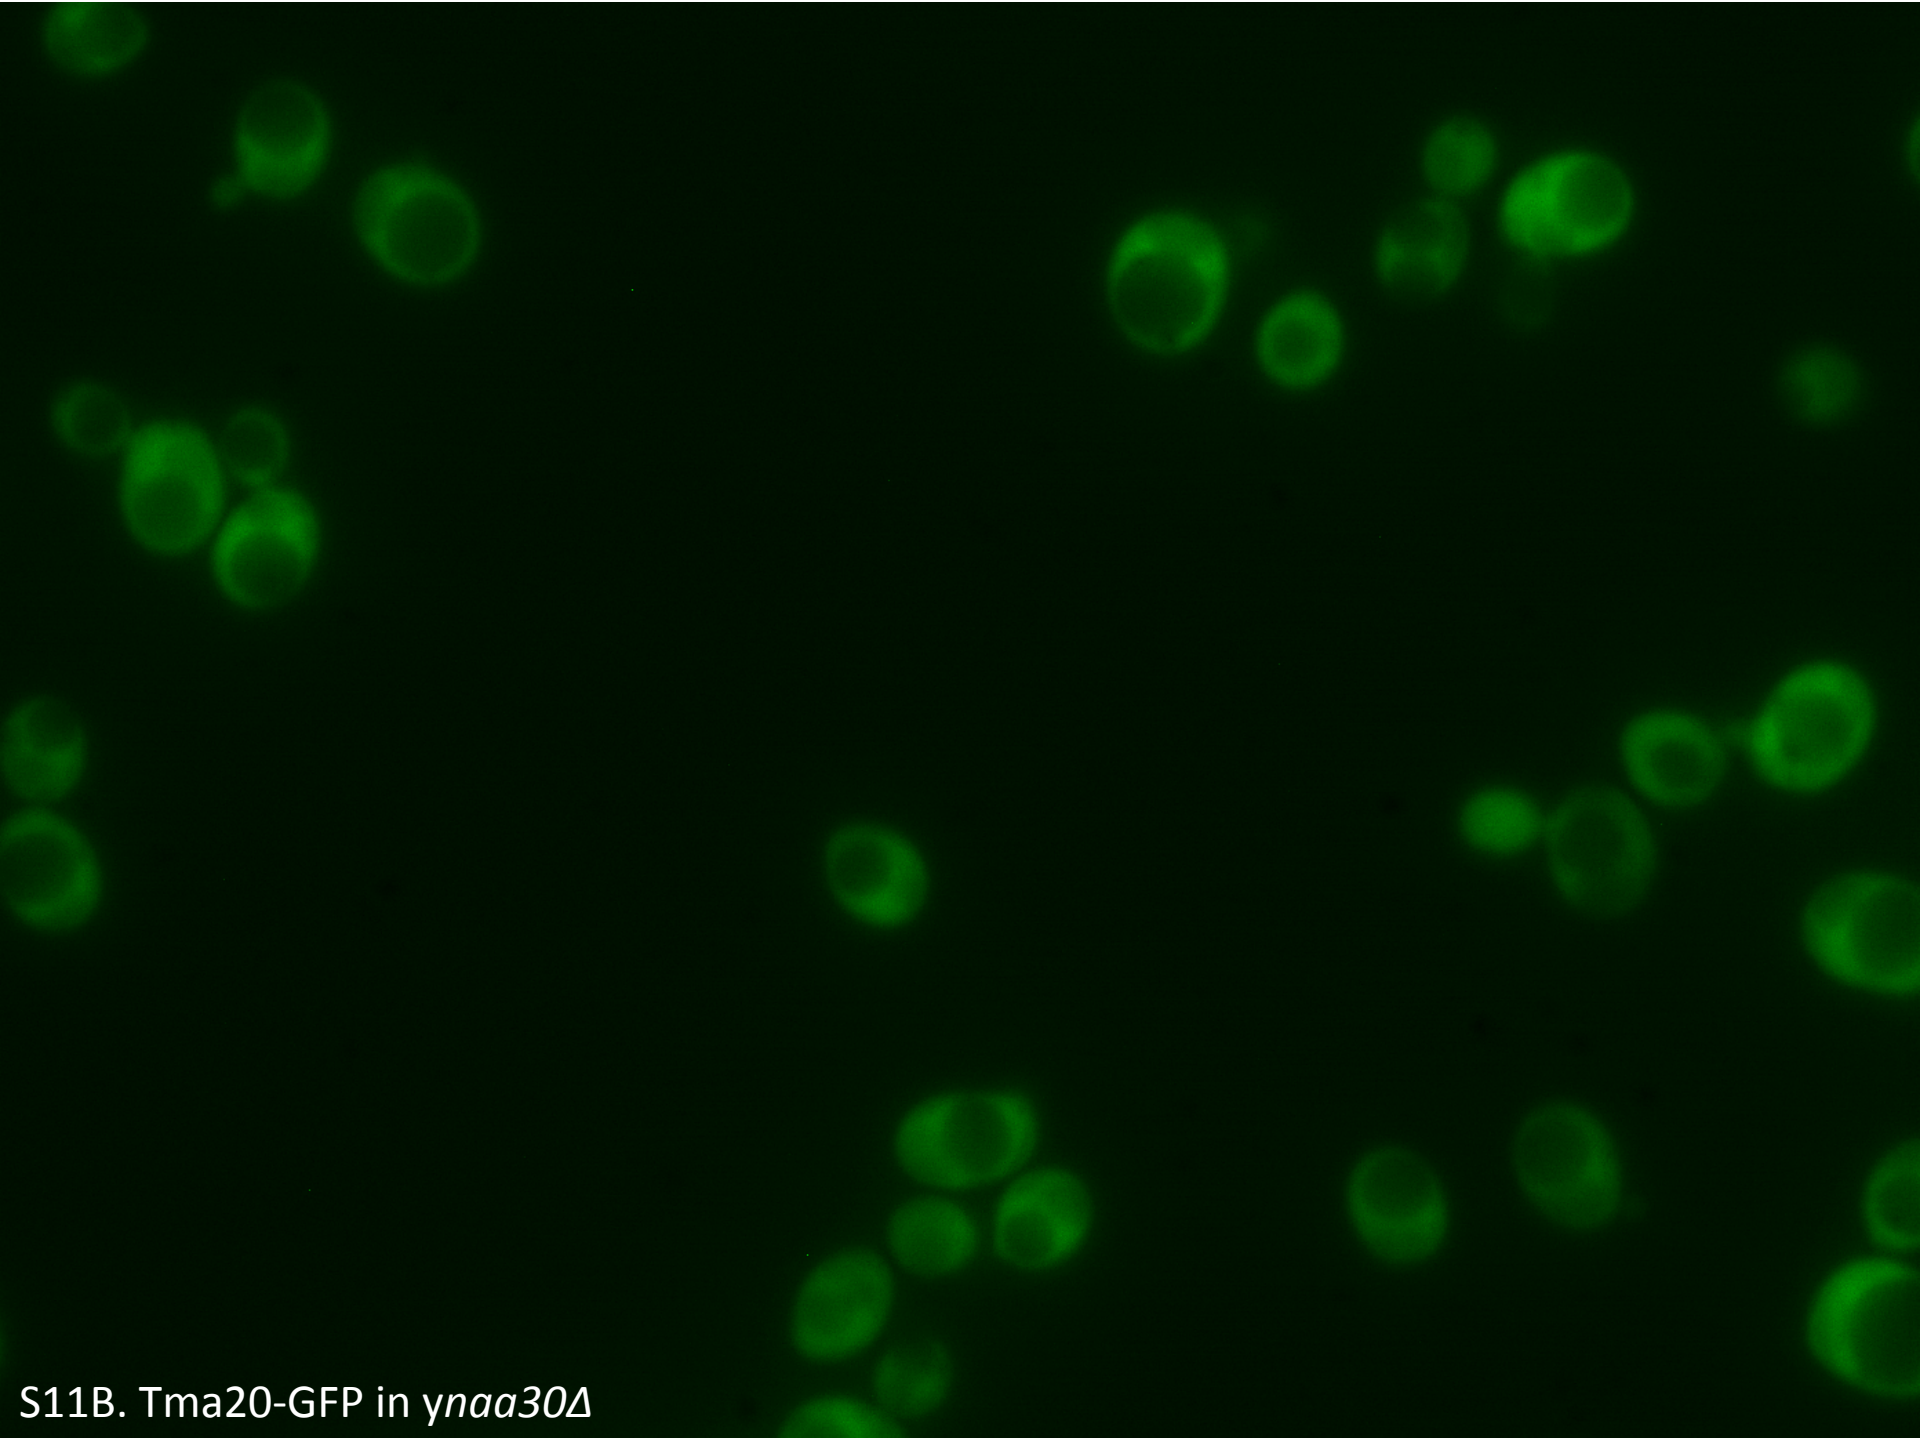

S11B. Tma20-GFP in *yna30Δ*
