# Supplementary material for: N-Terminal Acetylation by NatC Is Not a General Determinant for Substrate Subcellular Localization in Saccharomyces cerevisiae
Source: PubMed Central journal article supplement (PMC3626706; doi:10.1371/journal.pone.0061012), 2013-04-15
Supplement: pone.0061012.s016.pdf [file pone.0061012.s016.pdf]

**Table S1. Yeast strains used in this study.**

| <b>Strain</b> | <b>Genotype</b>                                                                                                                                                                                                           |
|---------------|---------------------------------------------------------------------------------------------------------------------------------------------------------------------------------------------------------------------------|
| TA36          | BY4742 <i>Mata</i> $\alpha$ ; <i>his3</i> $\Delta$ 1; <i>leu2</i> $\Delta$ 0; <i>lys2</i> $\Delta$ 0; <i>ura3</i> $\Delta$ 0                                                                                              |
| TA44          | BY4742; <i>Mata</i> $\alpha$ ; <i>his3</i> $\Delta$ 1; <i>leu2</i> $\Delta$ 0; <i>lys2</i> $\Delta$ 0; <i>ura3</i> $\Delta$ 0; <i>naa30</i> $\Delta$ :: <i>kanMX4</i>                                                     |
| TA256         | BY4741; <i>Mata</i> ; <i>his3</i> $\Delta$ 1; <i>leu2</i> $\Delta$ 0; <i>met15</i> $\Delta$ 0; <i>ura3</i> $\Delta$ 0; <i>ARL3</i> :: <i>GFP-HIS3MX6</i>                                                                  |
| TA266         | BY4741; <i>Mata</i> ; <i>his3</i> $\Delta$ 1; <i>leu2</i> $\Delta$ 0; <i>met15</i> $\Delta$ 0; <i>ura3</i> $\Delta$ 0; <i>ARL3</i> :: <i>GFP-HIS3MX6</i> ; <i>naa30</i> $\Delta$ :: <i>kanMX4</i>                         |
| TA255         | BY4741; <i>Mata</i> ; <i>his3</i> $\Delta$ 1; <i>leu2</i> $\Delta$ 0; <i>met15</i> $\Delta$ 0; <i>ura3</i> $\Delta$ 0; <i>TRM1</i> :: <i>GFP-HIS3MX6</i>                                                                  |
| TA264         | BY4741; <i>Mata</i> ; <i>his3</i> $\Delta$ 1; <i>leu2</i> $\Delta$ 0; <i>met15</i> $\Delta$ 0; <i>ura3</i> $\Delta$ 0; <i>TRM1</i> :: <i>GFP-HIS3MX6</i> ; <i>naa30</i> $\Delta$ :: <i>kanMX4</i>                         |
| TA101         | BY4741; <i>Mata</i> ; <i>his3</i> $\Delta$ 1; <i>leu2</i> $\Delta$ 0; <i>met15</i> $\Delta$ 0; <i>ura3</i> $\Delta$ 0; <i>SEC18</i> :: <i>GFP-HIS3MX6</i>                                                                 |
| TA114         | BY4741; <i>Mata</i> ; <i>his3</i> $\Delta$ 1; <i>leu2</i> $\Delta$ 0; <i>met15</i> $\Delta$ 0; <i>ura3</i> $\Delta$ 0; <i>SEC18</i> :: <i>GFP-HIS3MX6</i> ; <i>naa30</i> $\Delta$ :: <i>kanMX4</i>                        |
| TA258         | BY4741; <i>Mata</i> ; <i>his3</i> $\Delta$ 1; <i>leu2</i> $\Delta$ 0; <i>met15</i> $\Delta$ 0; <i>ura3</i> $\Delta$ 0; <i>SLY41</i> :: <i>GFP-HIS3MX6</i>                                                                 |
| TA285         | BY4741; <i>Mata</i> ; <i>his3</i> $\Delta$ 1; <i>leu2</i> $\Delta$ 0; <i>met15</i> $\Delta$ 0; <i>ura3</i> $\Delta$ 0; <i>SLY41</i> :: <i>GFP-HIS3MX6</i> ; <i>naa30</i> $\Delta$ :: <i>kanMX4</i>                        |
| TA134         | BY4741; <i>Mata</i> ; <i>his3</i> $\Delta$ 1; <i>leu2</i> $\Delta$ 0; <i>met15</i> $\Delta$ 0; <i>ura3</i> $\Delta$ 0; <i>NUP157</i> :: <i>GFP-HIS3MX6</i>                                                                |
| TA154         | BY4741; <i>Mata</i> ; <i>his3</i> $\Delta$ 1; <i>leu2</i> $\Delta$ 0; <i>met15</i> $\Delta$ 0; <i>ura3</i> $\Delta$ 0; <i>NUP157</i> :: <i>GFP-HIS3MX6</i> ; <i>naa30</i> $\Delta$ :: <i>kanMX4</i>                       |
| TA126         | BY4741; <i>Mata</i> ; <i>his3</i> $\Delta$ 1; <i>leu2</i> $\Delta$ 0; <i>met15</i> $\Delta$ 0; <i>ura3</i> $\Delta$ 0; <i>RRN11</i> :: <i>GFP-HIS3MX6</i>                                                                 |
| TA139         | BY4741; <i>Mata</i> ; <i>his3</i> $\Delta$ 1; <i>leu2</i> $\Delta$ 0; <i>met15</i> $\Delta$ 0; <i>ura3</i> $\Delta$ 0; <i>RRN11</i> :: <i>GFP-HIS3MX6</i> ; <i>naa30</i> $\Delta$ :: <i>kanMX4</i>                        |
| TA308         | BY4741; <i>Mata</i> ; <i>his3</i> $\Delta$ 1; <i>leu2</i> $\Delta$ 0; <i>met15</i> $\Delta$ 0; <i>ura3</i> $\Delta$ 0; <i>RFC2</i> :: <i>GFP-HIS3MX6</i>                                                                  |
| TA311         | BY4741; <i>Mata</i> ; <i>his3</i> $\Delta$ 1; <i>leu2</i> $\Delta$ 0; <i>met15</i> $\Delta$ 0; <i>ura3</i> $\Delta$ 0; <i>RFC2</i> :: <i>GFP-HIS3MX6</i> ; <i>naa30</i> $\Delta$ :: <i>kanMX4</i>                         |
| TA127         | BY4741; <i>Mata</i> ; <i>his3</i> $\Delta$ 1; <i>leu2</i> $\Delta$ 0; <i>met15</i> $\Delta$ 0; <i>ura3</i> $\Delta$ 0; <i>YMR31</i> :: <i>GFP-HIS3MX6</i>                                                                 |
| TA159         | BY4741; <i>Mata</i> ; <i>his3</i> $\Delta$ 1; <i>leu2</i> $\Delta$ 0; <i>met15</i> $\Delta$ 0; <i>ura3</i> $\Delta$ 0; <i>YMR31</i> :: <i>GFP-HIS3MX6</i> ; <i>naa30</i> $\Delta$ :: <i>kanMX4</i>                        |
| TA129         | BY4741; <i>Mata</i> ; <i>his3</i> $\Delta$ 1; <i>leu2</i> $\Delta$ 0; <i>met15</i> $\Delta$ 0; <i>ura3</i> $\Delta$ 0; <i>PDA1</i> :: <i>GFP-HIS3MX6</i>                                                                  |
| TA145         | BY4741; <i>Mata</i> ; <i>his3</i> $\Delta$ 1; <i>leu2</i> $\Delta$ 0; <i>met15</i> $\Delta$ 0; <i>ura3</i> $\Delta$ 0; <i>PDA1</i> :: <i>GFP-HIS3MX6</i> ; <i>naa30</i> $\Delta$ :: <i>kanMX4</i>                         |
| TA131         | BY4741; <i>Mata</i> ; <i>his3</i> $\Delta$ 1; <i>leu2</i> $\Delta$ 0; <i>met15</i> $\Delta$ 0; <i>ura3</i> $\Delta$ 0; <i>GLR1</i> :: <i>GFP-HIS3MX6</i>                                                                  |
| TA147         | BY4741; <i>Mata</i> ; <i>his3</i> $\Delta$ 1; <i>leu2</i> $\Delta$ 0; <i>met15</i> $\Delta$ 0; <i>ura3</i> $\Delta$ 0; <i>GLR1</i> :: <i>GFP-HIS3MX6</i> ; <i>naa30</i> $\Delta$ :: <i>kanMX4</i>                         |
| TA297         | BY4741; <i>Mata</i> ; <i>his3</i> $\Delta$ 1; <i>leu2</i> $\Delta$ 0; <i>met15</i> $\Delta$ 0; <i>ura3</i> $\Delta$ 0; <i>TMA20</i> :: <i>GFP-HIS3MX6</i>                                                                 |
| TA298         | BY4741; <i>Mata</i> ; <i>his3</i> $\Delta$ 1; <i>leu2</i> $\Delta$ 0; <i>met15</i> $\Delta$ 0; <i>ura3</i> $\Delta$ 0; <i>TMA20</i> :: <i>GFP-HIS3MX6</i> ; <i>naa30</i> $\Delta$ :: <i>kanMX4</i>                        |
| TA128         | BY4741; <i>Mata</i> ; <i>his3</i> $\Delta$ 1; <i>leu2</i> $\Delta$ 0; <i>met15</i> $\Delta$ 0; <i>ura3</i> $\Delta$ 0; <i>LRG1</i> :: <i>GFP-HIS3MX6</i>                                                                  |
| TA142         | BY4741; <i>Mata</i> ; <i>his3</i> $\Delta$ 1; <i>leu2</i> $\Delta$ 0; <i>met15</i> $\Delta$ 0; <i>ura3</i> $\Delta$ 0; <i>LRG1</i> :: <i>GFP-HIS3MX6</i> ; <i>naa30</i> $\Delta$ :: <i>kanMX4</i>                         |
| TA130         | BY4741; <i>Mata</i> ; <i>his3</i> $\Delta$ 1; <i>leu2</i> $\Delta$ 0; <i>met15</i> $\Delta$ 0; <i>ura3</i> $\Delta$ 0; <i>BEM1</i> :: <i>GFP-HIS3MX6</i>                                                                  |
| TA146         | BY4741; <i>Mata</i> ; <i>his3</i> $\Delta$ 1; <i>leu2</i> $\Delta$ 0; <i>met15</i> $\Delta$ 0; <i>ura3</i> $\Delta$ 0; <i>BEM1</i> :: <i>GFP-HIS3MX6</i> ; <i>naa30</i> $\Delta$ :: <i>kanMX4</i>                         |
| TA262         | BY4741; <i>Mata</i> ; <i>his3</i> $\Delta$ 1; <i>leu2</i> $\Delta$ 0; <i>met15</i> $\Delta$ 0; <i>ura3</i> $\Delta$ 0; <i>PXL1</i> :: <i>GFP-HIS3MX6</i>                                                                  |
| TA274         | BY4741; <i>Mata</i> ; <i>his3</i> $\Delta$ 1; <i>leu2</i> $\Delta$ 0; <i>met15</i> $\Delta$ 0; <i>ura3</i> $\Delta$ 0; <i>PXL1</i> :: <i>GFP-HIS3MX6</i> ; <i>naa30</i> $\Delta$ :: <i>kanMX4</i>                         |
| TA261         | BY4741; <i>Mata</i> ; <i>his3</i> $\Delta$ 1; <i>leu2</i> $\Delta$ 0; <i>met15</i> $\Delta$ 0; <i>ura3</i> $\Delta$ 0; <i>TGL1</i> :: <i>GFP-HIS3MX6</i>                                                                  |
| TA272         | BY4741; <i>Mata</i> ; <i>his3</i> $\Delta$ 1; <i>leu2</i> $\Delta$ 0; <i>met15</i> $\Delta$ 0; <i>ura3</i> $\Delta$ 0; <i>TGL1</i> :: <i>GFP-HIS3MX6</i> ; <i>naa30</i> $\Delta$ :: <i>kanMX4</i>                         |
| TA132         | BY4741; <i>Mata</i> ; <i>his3</i> $\Delta$ 1; <i>leu2</i> $\Delta$ 0; <i>met15</i> $\Delta$ 0; <i>ura3</i> $\Delta$ 0; <i>PMT7</i> :: <i>GFP-HIS3MX6</i>                                                                  |
| TA150         | BY4741; <i>Mata</i> ; <i>his3</i> $\Delta$ 1; <i>leu2</i> $\Delta$ 0; <i>met15</i> $\Delta$ 0; <i>ura3</i> $\Delta$ 0; <i>PMT7</i> :: <i>GFP-HIS3MX6</i> ; <i>naa30</i> $\Delta$ :: <i>kanMX4</i>                         |
| TA300         | BY4741; <i>Mata</i> ; <i>his3</i> $\Delta$ 1; <i>leu2</i> $\Delta$ 0; <i>met15</i> $\Delta$ 0; <i>ura3</i> $\Delta$ 0; <i>YMR31</i> :: <i>GFP-HIS3MX6</i> ; <i>pYX142-mtRFPm</i>                                          |
| TA302         | BY4741; <i>Mata</i> ; <i>his3</i> $\Delta$ 1; <i>leu2</i> $\Delta$ 0; <i>met15</i> $\Delta$ 0; <i>ura3</i> $\Delta$ 0; <i>YMR31</i> :: <i>GFP-HIS3MX6</i> ; <i>naa30</i> $\Delta$ :: <i>kanMX4</i> ; <i>pYX142-mtRFPm</i> |
| TA304         | BY4741 <i>Mata</i> ; <i>his3</i> $\Delta$ 1; <i>leu2</i> $\Delta$ 0; <i>met15</i> $\Delta$ 0; <i>ura3</i> $\Delta$ 0; <i>PDA1</i> :: <i>GFP-HIS3MX6</i> ; <i>pYX142-mtRFPm</i>                                            |
| TA306         | BY4741; <i>Mata</i> ; <i>his3</i> $\Delta$ 1; <i>leu2</i> $\Delta$ 0; <i>met15</i> $\Delta$ 0; <i>ura3</i> $\Delta$ 0; <i>PDA1</i> :: <i>GFP-HIS3MX6</i> ; <i>naa30</i> $\Delta$ :: <i>kanMX4</i> ; <i>pYX142-mtRFPm</i>  |
